# Supplementary material
Source: PubMed Central journal article supplement (PMC2387225)
Supplement: NIHMS49931-supplement-Arrays.pdf [file NIHMS49931-supplement-Arrays.pdf]

# Supporting Online Material for Organism Size Promotes the Evolution of Specialized Cells in Multicellular Digital Organisms

Martin Willensdorfer

Program for Evolutionary Dynamics,  
Department of Molecular and Cellular Biology,  
Harvard University, Cambridge, MA 02138, USA.  
E-mail: ma.wi@gmx.at

## Contents

|          |                                                             |           |
|----------|-------------------------------------------------------------|-----------|
| <b>1</b> | <b>Digital Self-Replicating Cellular Organisms (DISCOs)</b> | <b>2</b>  |
| 1.1      | The Cell . . . . .                                          | 2         |
| 1.2      | Environment, Fitness, Merit, and Logic Functions . . . . .  | 5         |
| 1.3      | Multicellularity . . . . .                                  | 7         |
| <b>2</b> | <b>Details about the -X and +X simulations</b>              | <b>9</b>  |
| <b>3</b> | <b>Developmental cost of one Y cell</b>                     | <b>13</b> |
| <b>A</b> | <b>List of Instructions</b>                                 | <b>17</b> |
| <b>B</b> | <b>Example Genomes</b>                                      | <b>19</b> |

# 1 Digital Self-Replicating Cellular Organisms (DISCOs)

This section provides details about DISCOs. Since I was motivated by Lenski *et. al.* (1), DISCOs are very similar to Avididans, that is, digital organisms developed by Christoph Adami (2). However, there are some important differences: (a) DISCOs have a cell cycle with a metabolic and a replication phase, (b) DISCOs have a minimal and disjunct set of instructions for each phase, (c) DISCOs can only copy their genome to a daughter strand and cannot modify their own genome, and (d) DISCOs can evolve multicellularity. Modifications (a)–(c) make it possible to directly identify the genomic basis of a phenotypic feature and modification (d) makes it possible to study the evolution of multicellularity.

Section 1.1 explains in detail how a single DISCO cell works. Section 1.2 describes how fitness is realized in DISCOs and how a DISCO can increase its fitness by computing logic functions. Finally, Section 1.3 explains aspects of multicellularity in DISCOs.

## 1.1 The Cell

A DISCO cell is a computing automaton with the ability to replicate. Each DISCO has a genome, that is, a sequence of instructions and modifiers. The instructions are designed to operate on the automaton and change its state in certain ways. This state change depends not only on the instruction but also on modifiers in the genome. For the following, however, I will use the term instruction to refer to an instruction and all the modifiers in the genome that affect the action of this instruction. Appendix A contains detailed information about how modifiers affect each instruction. In DISCOs modifiers are also used to encode multicellularity in the genome as we will see in Section 1.3.

Naturally, the execution of a sequence of instructions leads to a sequence of state changes of the automaton. The right sequence of instructions can cause state changes that result in the

computation of logic functions, genome replication, and, finally, cell division. Which sequence of instructions a cell will actually execute is determined by its genome. Hence, the genome determines the ability of a cell to compute logic functions as well as speed and accuracy of replication, which constitute a cell's phenotype.

The life of a DISCO cell is divided into two phases, a metabolic and a replication phase. At the onset of each phase the automaton is reset and starts to execute instructions from the beginning of the genome. During the metabolic phase a cell can read and manipulate data to compute logic functions. During the replication phase a cell can copy its genome and initiate cell division. Each phase has its own set of instructions. We have a set of instructions for the metabolic phase (`blank`, `io`, `nand`, `swap`, `push`, `pop`) and a set of instructions for the replication phase (`copy`, `search`, `mov-head`, `if-label`, `divide`).

A newly created cell enters first the metabolic phase. The transition from metabolic to replication phase happens after the execution of  $m$  metabolic instructions ( $m$  is a simulation parameter and equals 300 in all described simulations). The replication phase, on the other hand, ends at the successful or unsuccessful attempt to initiate cell division, that is, at the execution of a `divide` instruction.

During the metabolic phase a DISCO cell can create data in the form of logic compounds. To make the production of logic compounds possible the automaton is equipped with **three registers** (A, B, and C) and one **stack**. The registers are the operating platform. They are used to store and manipulate data. New logic compounds can only be generated by using the `nand` instruction which manipulates data stored in the registers. The most basic logic compound is a logic variable and every logic compound is composed of logic variables and logic operators that connect these variables. Logic variables are supplied by the `io` instruction and stored in one of the three registers. By loading a new variable to a register, the `io` instruction might have to replace a logic compound that is stored in this register. Whenever a logic compound is replaced,

the `io` instruction checks whether this compound is equivalent to one of nine logic functions. If this is the case, then the DISCO will be rewarded (see next section). Data can also be copied from one of the registers to the stack with the `push` instruction and recovered with the `pop` instruction. The DISCO reads the metabolic instructions one by one from the genome. If the end of the genome is reached, the DISCO will continue from the beginning, that is, the genome is processed circular.

One might wonder how those activities relate to a biological metabolism. The analogy becomes quite obvious if one considers autotrophic processes like carbon fixation in plants. Plants convert carbon dioxide into organic compounds. The first stable intermediate is a 3-carbon compound. These trioses can be condensed into hexoses, sucrose, or cellulose. They can also be used to make amino acids and lipids. Hence, more complex organic compounds are assembled from simpler ones and all those compounds contribute to the fitness of the organism. The situation is analogous in DISCOs. However, a DISCO handles logic compounds instead of organic ones. Logic variables are assembled with the `and` instruction to form more complex logic compounds and, as with real organisms, certain compounds can contribute considerably to the fitness of the organism.

The metabolic phase is followed by a replication phase. During the replication phase a DISCO can copy its genome and initiate cell division. The `copy` instruction instructs the automaton to copy a genome element to the daughter strand. Which element of the genome is copied depends on the position of the so called **read head**. Heads are pointers that the automaton can use to mark elements of the genome. Besides the read head the automaton has an **instruction head** and a **flow head**. The read head shows the automaton which element of the genome has to be copied next. It moves forward to the next element after each copy event. The instruction head shows the automaton which instruction has to be executed next and does also move forward after the instruction has been executed. The flow head is used to mark

positions in the genome to which either the instruction head or the read had can be moved by the `mov-head` instruction. This together with the `if-label` instruction allows to encode jumps and loops in the genome. Cell division is initiated by the `divide` instruction. The execution of a `divide` instruction will always lead to a switch from the replication phase to the metabolic phase, regardless of whether it was successful or not.

Appendix A describes precisely how each instruction changes the state of the automaton and how modifiers can affect this state change. Appendix B contains some example genomes and illustrates how a sequence of instructions can encode logic functions and cell replication.

## 1.2 Environment, Fitness, Merit, and Logic Functions

DISCOs live in an unstructured environment that can accommodate a given number of organisms. In this environment DISCOs compete for the opportunity to execute instructions. For each iteration only one DISCO is selected and the selected DISCO can execute only one instruction. Most of the times the execution of an instruction will only affect the DISCO internally. At some point, however, a DISCO will produce offspring. The offspring is first exposed to replacement (copy), insertion, and deletion mutations and then placed at a randomly chosen position in the environment. In most cases this will result in the replacement (death) of another DISCO.

The frequency with which DISCOs are chosen to execute an instruction is proportional to their merit. Consequently, the more merit a DISCO has, the more frequently it will be chosen to execute an instruction. Obviously, if the number of instructions that have to be executed until a cell divides is the same for two DISCOs, then the one with the greater merit will have the higher fitness. On the other hand, if two DISCOs have the same merit, then the one that has to execute less instructions until cell division will have the higher fitness. We see that there are two components that determine the fitness of a DISCO: (a) its merit (relative to the merit of the other organisms) and (b) the speed of replication (i.e., the number of instructions that have to

be executed until a cell divides).

As mentioned above, a DISCO can manipulate data to create logic compounds. By creating compounds that are equivalent to specific logic functions, a DISCO can increase its merit and consequently its fitness. A DISCO can only generate logic compounds by applying the `nand` instruction. The `nand` instruction connects two data elements (a data element is either a logic variable or a logic compound) with the NAND (“Not And”) operation. The NAND operator ( $|$ ) is defined as the negation ( $\neg$ ) of the conjunction ( $\wedge$ ), that is,  $(a|b) = \neg(a \wedge b)$ . The resulting logic compound is false if and only if both  $a$  and  $b$  are true. Formal logic shows that every truth-functional compound can be expressed by using just the NAND operator (3). For example, we can write  $\neg a = a|a$  and  $a \wedge b = (a|b)|(a|b)$ . Since a DISCO can apply the NAND operation, it can also produce a multitude of logic compounds. With the `io` instruction a DISCO can test whether a data element is equivalent to one of up to nine logic functions. If so, then the DISCO is rewarded with a merit increase. By how much the merit is increased depends on the complexity of the logic function (see below and Section 2). Hence, a DISCO receives a reward for the construction of meaningful logic compounds. Selection will therefore favor DISCOs that can construct such logic compounds.

For simplicity, the merit of an organism remains unchanged until it produces offspring. Each time a DISCO produces new offspring its merit is newly calculated according to the logic compounds it was able to create. One has to keep in mind that newly born DISCOs have not yet had the chance to construct any logic compounds. To avoid disadvantageous for newborns, they start off with the parental merit until they reached maturity and produce their own offspring.

The table below lists the nine logic operators that a DISCO can compute to change its merit. During a simulation logic operators are identified by calculating the truth value of the expression in the second column, where  $C$  is a logic compound that a DISCO generated. The truth value of the expression in column two is calculated by using randomly generated 64-bit integers as

instances for the logic variables  $a$  and  $b$ . The NAND operation as well as the logic operations are applied bit-wise. An example is given below.

It is convenient to summarize which logic functions the genome of a DISCO can compute by using a nine digit binary code. For example a 000000000 tells us that the genome does not encode for any logic function; a 101101000 that the genome can compute NOT, AND, OR\_N, and AND\_N, and a 111111011 that the genome can compute all nine logic functions except for XOR.

| logic operator | definition <sup>1</sup>                                                  | minimum number<br>of NAND required |
|----------------|--------------------------------------------------------------------------|------------------------------------|
| NOT            | $C(a) \equiv \neg a$                                                     | 1                                  |
| NAND           | $C(a, b) \equiv \neg(a \wedge b)$                                        | 1                                  |
| AND            | $C(a, b) \equiv a \wedge b$                                              | 2                                  |
| OR_N           | $(C(a, b) \equiv a \vee \neg b) \vee (C(a, b) \equiv \neg a \vee b)$     | 2                                  |
| OR             | $C(a, b) \equiv a \vee b$                                                | 3                                  |
| AND_N          | $(C(a, b) \equiv a \wedge \neg b) \vee (C(a, b) \equiv \neg a \wedge b)$ | 3                                  |
| XOR            | $C(a, b) \equiv (a \vee b) \wedge \neg(a \wedge b)$                      | 4                                  |
| NOR            | $C(a, b) \equiv \neg(a \vee b)$                                          | 4                                  |
| EQU            | $C(a, b) \equiv (a \wedge b) \vee (\neg a \wedge \neg b)$                | 5                                  |

|                                                                                          |                                                 |                |
|------------------------------------------------------------------------------------------|-------------------------------------------------|----------------|
| $a$                                                                                      | : 110101110001110011111001100010001000001000... | 64-bit integer |
| $b$                                                                                      | : 000100101101101001011100000111110000101000... | 64-bit integer |
| $C(a, b)$                                                                                | : 000100100001100001011000000010000000001000... | 64-bit integer |
| We have $C(a, b) \equiv a \wedge b$ and conclude that compound $C(a, b)$ encodes for AND |                                                 |                |

### 1.3 Multicellularity

So far I have described how the genome of a DISCO determines the phenotype of a single cell. The genome can also encode information about the development of a multicellular organism.

<sup>1</sup> $\neg, \wedge, \vee,$  and  $\equiv$  symbolize the logical negation, conjunction (and), disjunction (or), and equivalence.

A DISCOs life starts always with a single cell, the default (D) cell. Each organism has exactly one D cell and the D cell is the only reproductive cell. After the first cell division the D cell has two options. It can either release the daughter cell into the environment as offspring and remain unicellular, or retain the cell as a first step towards the development of a multicellular organism. If, how many, and what kind of cells are retained is encoded in the genome.

To understand how multicellularity is encoded, we have to remind ourselves that the genome is a sequence of instructions and modifiers. Among the set of instructions, the `divide` instruction is special because it is the only one that is not affected by modifiers. To keep things as simple as possible, I decided to exploit this feature of the `divide` instruction. In particular, the D cell will retain one cell for each `divide` instruction in the genome that is followed by a modifier. Depending on the kind of modifier the retained daughter cell is assigned to a somatic cell type. For example, a `divide|A` encodes for a X cell, whereas a `divide|B` and a `divide|C` encodes for a Y and a Z cell, respectively. (Z cells are not relevant for this work and just mentioned for completeness.) After a daughter cell has been retained for each such `divide` instruction, the D cell is able to release daughter cells as offspring into the environment (see Figure 1 for an example). Please note that the genome might not contain any `divide` instruction that is followed by a modifier and would therefore encode for a unicellular organism (see Appendix B for examples).

Most multicellular organisms have specialized cells. Even though the specialized cells of a multicellular organism contain in most cases the same genome as the replicative cells, they behave differently. Specialized cells in DISCOs work analogous. The genome of a cell might be able to compute all logic functions, but cells can only utilize logic functions according to their cell type. For this work, D and X cells can only benefit from the first six logic functions and Y cells only from the last three functions that might be encoded in the genome (see Section 2).



It is important to point out that, even though a DISCO can be composed of several cells, each cell is still an independent automaton that executes one instruction after another. In fact, whenever a multicellular DISCO is selected by the environment to execute an instruction, each cell of this organism will execute one instruction.

## 2 Details about the -X and +X simulations

This section describes the -X and the +X simulations in more detail. For computational reasons I limited the population size to 200 (uni- or multicellular) DISCOs. I conducted 500 runs for each type of simulation, which differed only with respect to the seed for the random number generator. Both types of simulations have two parts (a) an initial 10 000 generations ( $2 \times 10^6$  replication events) in which specialized cells are not beneficial and (b) a further 10 000 generations in which specialized cells are advantageous.

For the first 10 000 generations, each simulation was initiated with the same genome. This genome contains 141 ‘blank’ instructions (essentially a place holder, see Appendix A) and a sequence of 9 instructions, ‘search|copy|if-label|C|A|divide|mov-head|A|B’, which encodes cell replication (see Appendix B). Thus, the ancestral DISCO could not compute any logic function and was unicellular. The initial genome has length 150. During all simulations, genome length was restricted to [145, 155], that is, offspring was nonviable if its genome was smaller than 145 or larger than 155. After the first 10 000 generations I determine the most recent common ancestor (MRCA) of the population. The genome of the MRCA is then used to seed the population for the next 10 000 generations. That is, the second part of a run is initialized with a genome that was produced during the first part of this run.

During the simulations, offspring was exposed to copy, insertion, and deletion mutations. For each offspring, the number of copy, insertion, and deletion mutations is chosen from a

Poisson distribution with mean 0.45, 0.025, and 0.025, respectively. An average mutation rate of 0.5 instructions per replication ( $\approx 3.4 \times 10^{-3}$  mutations per instruction per replication) was chosen because it seemed to be optimal for the evolution of Y cell specific logic functions.

The merit of an organism is calculated based on the merit of its cells. The merit of a cell in turn is calculated based on the logic functions it can compute and utilize. A cell that cannot compute any logic function has merit 1. The second column of Table 1 shows how the merit of a cell changes if it is able to compute (and utilize) the corresponding logic function. The values were taken from Lenski et al. (1) and reflect the complexity of the respective function. In particular, the merit of a cell is multiplied by  $2^n$  if the cell is able to compute a logic function of complexity  $n$ , where  $n$  gives the minimum number of NAND operations that are required to construct the logic function [see (1) and Section 1.2]. As mentioned before, not every cell is able to utilize every logic function. Which kind of cell can utilize which kind of functions during the first and the second part of the +X and the -X simulations is shown in Table 1.

Finally, the merit of the multicellular organism has to be calculated based on the merit of each cell. In short, the merit of an organism during the +X simulations is given by  $SUM(X, D) * SET(Y)$  and during the -X simulations by  $SET(X, D) * SET(Y)$ . The expression  $SUM(X, D)$  denotes the sum of merits of all D and X cells. Hence, during the +X simulations D and X cells contribute linearly to the merit of the organism.  $SET(\cdot)$  is equal to the merit of a cell that can compute the set of functions that all the cells in the argument can compute. For example,  $SET(X, D)$  equals the merit of a cell that can compute the same set of functions that all X and D cells can compute. Since X and D cells can encode and utilize the same functions,  $SET(X, D)$  is essentially equal to the merit of one D cell. Hence, additional X cells cannot contribute to the merit of the organism. Similarly,  $SET(Y)$  equals the merit of a cell that can compute the set of functions that all Y cells can compute. Again, since one Y cell can compute the set of functions that all Y cells can compute,  $SET(Y)$  is equal to the merit of one Y cell.

The use of  $SUM(X, D) * SET(Y)$  for the +X simulations was motivated by specialized cells in cyanobacteria. X and D cells are functionally equivalent and contribute additively to the merit of the organism: Two photosynthesizing vegetative cells can fix approximately twice as much carbon as one photosynthesizing cell. Y cells, however, are specialized cells that amplify the activity of X and D cells (by providing nitrogen, for example). This is reflected in the multiplicative contribution of Y cells to the merit of the organism. I use  $SET(Y)$  instead of  $SUM(Y)$  because DISCOs are thought to be small enough so that one Y cells can amplify the merit of X and D cells as well as two Y cells.

Figure 1 shows the first five cell divisions in the life of a multicellular DISCO composed of two X cells and one Y cell. It also shows what the merit of this organism would be during the first and the second part of the +X and -X simulations.

| logic function | change in merit | cell types that can utilize the given function |    |                           |    |
|----------------|-----------------|------------------------------------------------|----|---------------------------|----|
|                |                 | first 10 000 generations                       |    | second 10 000 generations |    |
|                |                 | +X                                             | -X | +X                        | -X |
| NOT            | $\times 2^1$    | D,X                                            | D  | D,X                       | D  |
| NAND           | $\times 2^1$    | D,X                                            | D  | D,X                       | D  |
| AND            | $\times 2^2$    | D,X                                            | D  | D,X                       | D  |
| OR_N           | $\times 2^2$    | D,X                                            | D  | D,X                       | D  |
| OR             | $\times 2^3$    | D,X                                            | D  | D,X                       | D  |
| AND_N          | $\times 2^3$    | D,X                                            | D  | D,X                       | D  |
| XOR            | $\times 2^4$    | -                                              | -  | Y                         | Y  |
| NOR            | $\times 2^4$    | -                                              | -  | Y                         | Y  |
| EQU            | $\times 2^5$    | -                                              | -  | Y                         | Y  |

Table 1: Merit increase and cell type specificity during the +X and -X simulations. Please note that X cells can utilize functions during the -X simulations but are not able to contribute to the merit of the organism, since I am using  $SET(D, X) * SET(Y)$  instead of  $SUM(D, X) * SET(Y)$ .



### 3 Developmental cost of one Y cell

I will calculate the fitness of an organism composed of  $n + 1$  cells relative to the fitness of an organism composed of  $n$  cells. Let us first consider  $n = 1$ . The unicellular organism produces offspring with every cell division at rate  $r_1$ , i.e.,  $\bigcirc \rightarrow \bigcirc + \bigcirc$ . Its fitness is given by the rate of cell division. The bicellular organism produces offspring only after it reached maturity. In DISCOs (see Figure 1a) only one cell is able to divide. Hence, we have  $\bigcirc \rightarrow \bigcirc\bigcirc \rightarrow \bigcirc\bigcirc + \bigcirc$ . If  $x_1$  and  $x_2$  denote the frequency of the bicellular organisms in the unicellular and the bicellular stage of development, respectively, and  $r_2$  the rate of cell division, then we can use the following differential equation to describe the population,

$$\begin{aligned} \dot{x}_1 &= -r_2 x_1 + r_2 x_2 - \Phi x_1 \\ \dot{x}_2 &= r_2 x_1 - \Phi x_2. \end{aligned} \tag{1}$$

The fitness of the bicellular organism is given by the average fitness  $\Phi$  at equilibrium, which is given by the largest eigenvalue of

$$\begin{pmatrix} -r_2 & r_2 \\ r_2 & 0 \end{pmatrix}. \tag{2}$$

A short calculation shows, that the eigenvalues,  $\lambda$ , are given by the solutions of  $\lambda(\lambda + r_2) - r_2^2$ . Equivalently, we can solve  $\lambda(\lambda + 1) - 1$  and multiply the solution with  $r_2$ . In any case, the fitness of the bicellular organism at equilibrium is given by  $\Phi = (\sqrt{5} - 1)/2 r_2 \approx 0.62 r_2$ . Hence the fitness of the bicellular organism relative to the fitness of the unicellular organism equals  $r_2 0.62 / r_1$ . In DISCOs the rate of cell division is proportional to the merit of the organism and the efficiency of genome duplication. Since we are just interested in the effect of mutations that add an additional cell to an organism, we have  $r_1 \approx r_2$ . Hence, mutations that turn a unicellular into a bicellular organism decrease the relative fitness to 0.62.

The calculations for an organism of size  $n$  are similar. To calculate the fitness,  $\Phi_n$ , of an

organism of size  $n$ , we have to calculate the largest eigenvalue of the following  $n \times n$  matrix,

$$\begin{pmatrix} -1 & 0 & \cdots & 0 & 1 \\ 1 & -1 & \ddots & & 0 \\ 0 & 1 & \ddots & \ddots & \vdots \\ \vdots & \ddots & \ddots & -1 & 0 \\ 0 & \cdots & 0 & 1 & 0 \end{pmatrix}. \quad (3)$$

The eigenvalues  $\lambda$  are given by the roots of  $\lambda(\lambda + 1)^{n-1} - 1$ . The fitness of an organism of size  $n + 1$  relative to an organism of size  $n$  is then given by  $\Phi_{n+1}/\Phi_n$ . For example, the cost of one additional, unused cell in an organism of size 10 is  $\Phi_{11}/\Phi_{10} = 0.184/0.197 = 0.934$ . The dotted line in Figure 2 shows  $\Phi_n$  and the solid line  $\Phi_{n+1}/\Phi_n$  for a wide range of organism sizes.

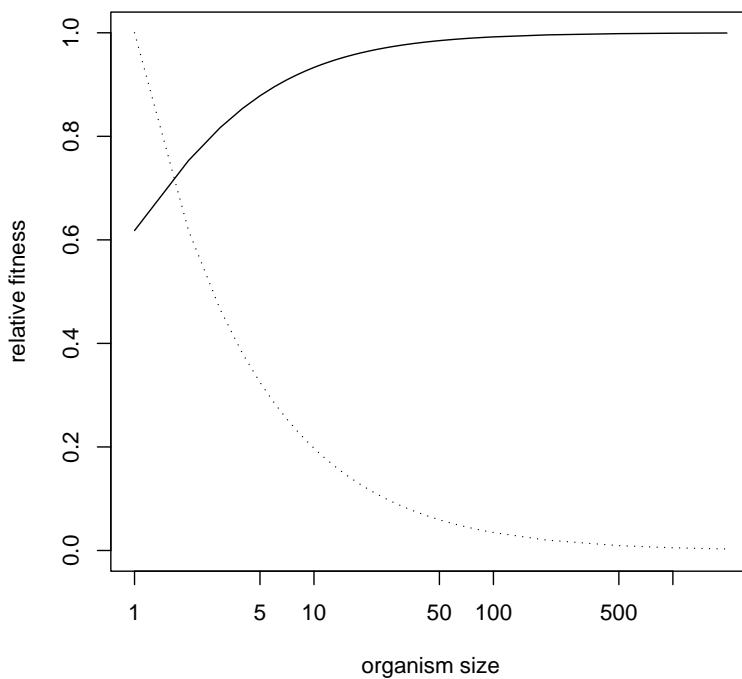

Figure 2: Developmental cost of an additional, unused cell. The dotted line shows the fitness of an organism of size  $n$  relative to the fitness of a unicellular organism. The solid line shows the fitness of an organism of size  $n + 1$  relative to the fitness of an organism of size  $n$ . Hence, it shows how deleterious mutations are that add one, unused Y cell to an organism of size  $n$ .

## References and Notes

1. Lenski R.E., Ofria C., Pennock R.T., & Adami C. (2003) *Nature* **423**, 139–44.
2. Ofria C. & Wilke C.O. (2004) *Artif Life* **10**, 191–229.
3. Goldfarb W. (2003) *Deductive Logic* (Hackett Publishing Company).



## A List of Instructions

This section describes how instructions together with modifiers change the state of a DISCO cell. In the following `inst` will refer to any of the available instructions, `mod` will refer to a sequence of modifiers, and  $C(\text{mod})$  to its complement. We have the three modifiers A, B, and C with their complements B, C, and A, respectively. The complement of a sequence of modifiers is given by the sequence of complements, for example,  $C(\text{CACABB}) = \text{ABABCC}$ .

### Instructions for the replication phase

**The copy instruction:** The `copy` instruction copies the instruction/modifiers to which the read head points to the daughter strand and moves the read head to the instruction/modifier following the just copied genome elements.

**The search instruction:** The `search` instruction repositions the flow head depending on modifier sequences in the genome. We have to distinguish the following cases.

- The `search` instruction is followed by another instruction, i.e., we have `... search inst ...`: In this case the flow head is moved to point at `inst`.
- The `search` instruction is followed by a sequence of modifiers, i.e., we have `... search mod ...`: In this case we look for the complement of the modifier sequence  $C(\text{mod})$  in the genome. If this sequence can be found, then the flow head is moved to point at the instruction following  $C(\text{mod})$ . If this sequence cannot be found, then the flow head is moved to point to the instruction following `mod`.

**The mov-head instruction:** The `mov-head` moves either the instruction head or the read head to the position of the flow head. The instruction head is moved to the flow head if the DISCO cell executes a `mov-head` that is followed by modifier A, i.e., `mov-head A`. If the `mov-head` is followed by modifier B, i.e., `mov-head B`, then the read head is moved to the flow head. In all other cases, the `mov-head` instruction does not affect the state of the automaton.

**The if-label instruction:** The `if-label` instruction can be used to skip instructions depending on the most recently copied genome element. Let us consider the sequence `if-label mod inst`. The `inst` instruction will be executed only if the most recently copied genome element is the complement of `mod`. If this is not the case, then `inst` will be ignored and the instruction head moved forward to the next instruction. In case of `if-label inst`, the automaton will execute `inst` if and only if the most recently copied genome element is an instruction.

**The divide instruction:** The `divide` instruction initiates cell division and terminates the replication phase. The `divide` instruction will successfully generate a new DISCO cell if the genome has the right length. For this work the genome cannot be smaller than 145 or larger than 155 modifiers and instructions long. The generated daughter cell is either used as a somatic cell or released into the environment as offspring.

### Instructions for the metabolic phase

The state changes for the metabolic phase are more straight forward than the ones for the replication phase. They only affect the merit of the organism and data stored in the registers and the stack. In the following I will use  $s_i$ ,  $a$ ,  $b$ , and  $c$  to denote logic compounds and  $x$  to denote a newly generated logic variable. The first column of following tables shows the state of the automaton before the sequence in the second column is executed. The third column

shows the state of the automaton after the execution of the sequence. Not shown is the advance of the instruction head to the next instruction.

**The blank instruction:** The blank instruction does not change the state of the automaton. It is essentially just used as a place holder in ancestral genomes. Usually, the blank instruction is not part of the pool of instructions from which instructions for the copy and insertion mutations are chosen. Consequently, blank instructions will eventually disappear from the genome.

**The io instruction:** The merit of the DISCO before the execution of the io instruction is given by  $m$ . The merit of the DISCO, after testing  $a$ ,  $b$ , and  $c$  for logic functions is given by  $m_a$ ,  $m_b$ , and  $m_c$ , respectively. A DISCO cell is rewarded only once for a given logic function during one metabolic phase.

| before                          | instruction | after                             |
|---------------------------------|-------------|-----------------------------------|
| merit: $m$ A: $a$ B: $b$ C: $c$ | io A        | merit: $m_a$ A: $x$ B: $b$ C: $c$ |
|                                 | io B        | merit: $m_b$ A: $a$ B: $x$ C: $c$ |
|                                 | io C        | merit: $m_c$ A: $a$ B: $b$ C: $x$ |
|                                 | io inst     | merit: $m_b$ A: $a$ B: $x$ C: $c$ |

**The nand instruction:** Please note that the nand instruction is the only instruction that can generate new logic compounds.

| before               | instruction | after                  |
|----------------------|-------------|------------------------|
| A: $a$ B: $b$ C: $c$ | nand A      | A: $a b$ B: $b$ C: $c$ |
|                      | nand B      | A: $a$ B: $b c$ C: $c$ |
|                      | nand C      | A: $a$ B: $b$ C: $c a$ |
|                      | nand inst   | A: $a$ B: $b c$ C: $c$ |

**The swap instruction:**

| before               | instruction | after                |
|----------------------|-------------|----------------------|
| A: $a$ B: $b$ C: $c$ | swap A      | A: $b$ B: $a$ C: $c$ |
|                      | swap B      | A: $a$ B: $c$ C: $b$ |
|                      | swap C      | A: $c$ B: $b$ C: $a$ |
|                      | swap inst   | A: $a$ B: $c$ C: $b$ |

**The push instruction:**

| before                                           | instruction | after                            |
|--------------------------------------------------|-------------|----------------------------------|
| A: $a$ B: $b$ C: $c$<br>stack: $s_1, s_2, \dots$ | push A      | stack: $a, s_1, s_2, s_3, \dots$ |
|                                                  | push B      | stack: $b, s_1, s_2, s_3, \dots$ |
|                                                  | push C      | stack: $c, s_1, s_2, s_3, \dots$ |
|                                                  | push inst   | stack: $b, s_1, s_2, s_3, \dots$ |

**The pop instruction:**

| before                                                      | instruction | after                                                                 |
|-------------------------------------------------------------|-------------|-----------------------------------------------------------------------|
| A:a B:b C:c<br>stack: s <sub>1</sub> , s <sub>2</sub> , ... | pop A       | A:s <sub>1</sub> B:b C:c stack: s <sub>2</sub> , s <sub>3</sub> , ... |
|                                                             | pop B       | A:a B:s <sub>1</sub> C:c stack: s <sub>2</sub> , s <sub>3</sub> , ... |
|                                                             | pop C       | A:a B:b C:s <sub>1</sub> stack: s <sub>2</sub> , s <sub>3</sub> , ... |
|                                                             | pop inst    | A:a B:s <sub>1</sub> C:c stack: s <sub>2</sub> , s <sub>3</sub> , ... |

## B Example Genomes

### Encoding Replication

The following shows a sequence of the state changes that lead to genome replication. During the replication phase, state changes affect only the position of the read, flow, and instruction head. These positions are indicated by underlines, overlines, and bold font, respectively, i.e., read head,  $\overline{\text{flow head}}$ , and **instruction head**.

- $\overline{\text{io}}$  | **search** | copy | if-label | C | A | divide | mov-head | A | B  
daughter strand:  
search moves the flow head to the copy instruction
- $\text{io}$  | search |  $\overline{\text{copy}}$  | if-label | C | A | divide | mov-head | A | B  
daughter strand:  
copy copies the io instruction to the daughter strand and moves the read head forward
- $\text{io}$  | search |  $\overline{\text{copy}}$  | **if-label** | C | A | divide | mov-head | A | B  
daughter strand: io  
The complement of C | A is given by A | B. Since the most recently copied element is io and not A | B, if-label ignores divide and advances the instruction head to the mov-head instruction.
- $\text{io}$  | search |  $\overline{\text{copy}}$  | if-label | C | A | divide | **mov-head** | A | B  
daughter strand: io  
mov-head moves the instruction head to the position of the flow head.
- $\text{io}$  | search |  $\overline{\text{copy}}$  | if-label | C | A | divide | mov-head | A | B  
daughter strand: io  
copy copies the search instruction to the daughter strand and moves the read head forward.
- $\text{io}$  | search |  $\overline{\text{copy}}$  | **if-label** | C | A | divide | mov-head | A | B  
daughter strand: io | search

This loop continues until the automaton copies A | B, the last genome element.

- $\text{io}$  | search |  $\overline{\text{copy}}$  | if-label | C | A | divide | mov-head | A | B  
daughter strand: io | search | copy | if-label | C | A | divide | mov-head  
Copies A | B to the daughter strand and moves the read head forward.
- $\overline{\text{io}}$  | search |  $\overline{\text{copy}}$  | **if-label** | C | A | divide | mov-head | A | B  
daughter strand: io | search | copy | if-label | C | A | divide | mov-head | A | B  
Now the most recently copied genome element is identical to the complement of C | A and if-label does not skip the divide instruction
- $\overline{\text{io}}$  | search |  $\overline{\text{copy}}$  | if-label | C | A | **divide** | mov-head | A | B  
daughter strand: io | search | copy | if-label | C | A | divide | mov-head | A | B  
The divide instruction ends the replication phase and the daughter strand is used to build a new cell.

## Encoding NAND and AND

This sequence creates two logic compounds. The first one  $(a|b)|(a|b)$  is equivalent to AND and the second one  $a|b$  is equivalent to NAND, where  $a$  and  $b$  are logic variables.

|                                                   |                     |                               |                                  |
|---------------------------------------------------|---------------------|-------------------------------|----------------------------------|
| <code>io io C nand push pop C nand io io C</code> | A: B:               | C: stack:                     | merit= 1                         |
| <code>io io C nand push pop C nand io io C</code> | A: B: <i>a</i>      | C: stack:                     | merit= 1                         |
| <code>io io C nand push pop C nand io io C</code> | A: B: <i>a</i>      | C: <i>b</i> stack:            | merit= 1                         |
| <code>io io C nand push pop C nand io io C</code> | A: B: <i>a b</i>    | C: <i>b</i> stack:            | merit= 1                         |
| <code>io io C nand push pop C nand io io C</code> | A: B: <i>a b</i>    | C: <i>b</i> stack: <i>a b</i> | merit= 1                         |
| <code>io io C nand push pop C nand io io C</code> | A: B: <i>a b</i>    | C: <i>a b</i> stack:          | merit= 1                         |
| <code>io io C nand push pop C nand io io C</code> | A: B: $(a b) (a b)$ | C: <i>a b</i> stack:          | merit= 1                         |
| <code>io io C nand push pop C nand io io C</code> | A: B: <i>c</i>      | C: <i>a b</i> stack:          | merit= $1 \times 2^2$            |
| <code>io io C nand push pop C nand io io C</code> | A: B: <i>c</i>      | C: <i>d</i> stack:            | merit= $1 \times 2^2 \times 2^1$ |

## Encoding NAND, AND, and Replication

This sequence is pieced together using the two sequences above. The first part encodes the two logic function NAND and AND, and the second part genome replication.

```
io|io|C|nand|push|pop|C|nand|io|io|C|search|copy|if-label|C|A|divide|
mov-head|A|B
```

## Encoding NAND, AND, Replication, and One Y Cell

This sequence is a derivative of the previous sequence. It contains a `divide|B` and encodes therefore for a multicellular organism with one Y cell. Please note that the `if-label|C` before the `divide` is required to prevent a premature initiation of cell division.

```
io|io|C|nand|push|if-label|C|divide|B|pop|C|nand|io|io|C|search|copy|
if-label|C|A|divide|mov-head|A|B
```
